# Supplementary material for: Contamination of Urban Stormwater Pond Sediments: A Study of 259 Legacy and Contemporary Organic Substances
Source: PubMed Central journal article supplement (PMC8026099; doi:10.1021/acs.est.0c07782), 2021-02-19
Supplement: es0c07782_si_001.pdf [file es0c07782_si_001.pdf]

**Supporting information for:**

## **Contamination of Urban Stormwater Pond Sediments: A Study of 259 Legacy and Contemporary Organic Substances**

*Kelsey Flanagan,<sup>1\*</sup> Godecke-Tobias Blecken,<sup>1</sup> Heléne Österlund,<sup>1</sup> Kerstin Nordqvist,<sup>1</sup> Maria Viklander<sup>1</sup>*

<sup>1</sup>Urban Water Engineering, Department of Civil, Environmental and Natural Resources Engineering, Luleå University of Technology, 971 87 Luleå, Sweden

**\*Corresponding author:**

**kelsey.flanagan@ltu.se**

26 pages; 11 tables; 3 figures

## I. Characteristics of studied facilities

| Facility    | Municipality | Facility type                 | Catchment classification | Catchment imperviousness | Catchment surface area (ha) | Type of inlet              | Year of construction | Facility volume (m3) | Facility surface area (ha) |
|-------------|--------------|-------------------------------|--------------------------|--------------------------|-----------------------------|----------------------------|----------------------|----------------------|----------------------------|
| <i>Ös-1</i> | Östersund    | Pond                          | Industrial / commercial  | <b>97</b>                | <b>91</b>                   | <b>Pipe</b>                | <b>2000</b>          | <b>9100</b>          | <b>0.45</b>                |
| <i>Ör-1</i> | Örebro       | Pond                          | Industrial / commercial  | <b>40</b>                | <b>40</b>                   | <b>Pipe</b>                | <b>1996</b>          | <b>1300</b>          | <b>0.13</b>                |
| <i>Ör-2</i> | Örebro       | Pond                          | Industrial / commercial  | <b>50</b>                | <b>57</b>                   | <b>Open channel</b>        | <b>2000</b>          | <b>ND</b>            | <b>0.48</b>                |
| <i>Ör-3</i> | Örebro       | Pond                          | Residential              | <b>22</b>                | <b>1490</b>                 | <b>Pipe</b>                | <b>2010</b>          | <b>20500</b>         | <b>1.78</b>                |
| <i>Ör-4</i> | Örebro       | Pond                          | Residential              | <b>5</b>                 | <b>14.5</b>                 | <b>Open channel</b>        | <b>2007</b>          | <b>ND</b>            | <b>0.33</b>                |
| <i>Ör-5</i> | Örebro       | Pond                          | Industrial / commercial  | <b>80</b>                | <b>30</b>                   | <b>Open channel</b>        | <b>2006</b>          | <b>5800</b>          | <b>0.5</b>                 |
| <i>Ör-6</i> | Örebro       | Pond                          | Industrial / commercial  | <b>75</b>                | <b>31</b>                   | <b>Open channel</b>        | <b>2006</b>          | <b>5800</b>          | <b>0.8</b>                 |
| <i>S-1</i>  | Stockholm    | Pond                          | Industrial / commercial  | <b>ND</b>                | <b>78</b>                   | <b>Pipe</b>                | <b>2009</b>          | <b>1450</b>          | <b>0.17</b>                |
| <i>S-2</i>  | Stockholm    | Pond                          | Residential              | <b>ND</b>                | <b>304</b>                  | <b>Pipe</b>                | <b>2007</b>          | <b>530</b>           | <b>0.05</b>                |
| <i>S-3</i>  | Stockholm    | Pond                          | Residential              | <b>ND</b>                | <b>770</b>                  | <b>Pipe</b>                | <b>1997</b>          | <b>ND</b>            | <b>0.06</b>                |
| <i>S-4</i>  | Stockholm    | Pond                          | Road / highway           | <b>50</b>                | <b>2</b>                    | <b>Pipe</b>                | <b>2002</b>          | <b>498</b>           | <b>0.03</b>                |
| <i>S-5</i>  | Stockholm    | Pond                          | Road / highway           | <b>ND</b>                | <b>ND</b>                   | <b>ND</b>                  | <b>ND</b>            | <b>ND</b>            | <b>0.06</b>                |
| <i>S-6</i>  | Stockholm    | Subsurface sedimentation tank | Road / highway           | <b>100</b>               | <b>1.14</b>                 | <b>Pipe</b>                | <b>1997</b>          | <b>132</b>           | <b>0.006</b>               |
| <i>V-1</i>  | Växjö        | Pond                          | Industrial / commercial  | <b>46</b>                | <b>519</b>                  | <b>Pipe / open channel</b> | <b>1989</b>          | <b>3300</b>          | <b>0.36</b>                |
| <i>V-2</i>  | Växjö        | Pond                          | Residential              | <b>30</b>                | <b>69</b>                   | <b>Pipe / open channel</b> | <b>2008</b>          | <b>6600</b>          | <b>0.36</b>                |
| <i>V-3</i>  | Växjö        | Pond                          | Industrial / commercial  | <b>60</b>                | <b>330</b>                  | <b>Pipe / open channel</b> | <b>1994</b>          | <b>17600</b>         | <b>1.1</b>                 |
| <i>V-4</i>  | Växjö        | Pond                          | Industrial / commercial  | <b>54</b>                | <b>7.5</b>                  | <b>Pipe</b>                | <b>1988</b>          | <b>870</b>           | <b>0.06</b>                |

**Table S1.** Characteristics of studied facilities. ND means that data was unavailable for a given site.

## II. Frequency of quantification of all substances

| Frequency                             | Substances                                 |                           |                              |               |
|---------------------------------------|--------------------------------------------|---------------------------|------------------------------|---------------|
| <b>Never quantified</b>               | C <sub>5</sub> -C <sub>8</sub> Aliphatics  | Styrene                   | Dimoxystrobin                | Methiocarb    |
|                                       | C <sub>8</sub> -C <sub>10</sub> Aliphatics | MTBE                      | Diuron                       | sulfoxide     |
|                                       | Nap                                        | Aldrin                    | Epoxiconazole                | Metconazole   |
|                                       | Acyl                                       | Dieldrin                  | Fenoxycarb                   | Metolachlor   |
|                                       | Acen                                       | Endrin                    | Fipronil                     | Methomyl      |
|                                       | A                                          | Isodrin                   | Fipronil sulfone             | Methomyl      |
|                                       | Dichloromethane                            | Telodrin                  | Fluazifop                    | oxime         |
|                                       | 1,1-dichloroethane                         | alpha-HCH                 | Fonofos                      | Metribuzin    |
|                                       | 1,2-dichloroethane                         | beta-HCH                  | Phorate                      | Oxamyl        |
|                                       | 1,2-dichloropropane                        | Lindane                   | Phosalone                    | Pendimethalin |
|                                       | Chloroform                                 | Heptachlor                | Phosphamidon                 | Pethoxamid    |
|                                       | Tetrachloromethane                         | cis-Heptachlor            | Phosmet                      | Pirimicarb    |
|                                       | Trans-1,2-dichloroethene                   | epoxide                   | Phosmet oxon                 | Prochloraz    |
|                                       | 1,1,1-trichloroethane                      | trans-Heptachlor          | Hexazinone                   | Prometon      |
|                                       | Trichloroethene                            | epoxide                   | 2-hydroxyatrazine            | Prometryn     |
|                                       | Vinyl chloride                             | alpha-Endosulfan          | Imidacloprid                 | Propazine     |
|                                       | Monochlorobenzene                          | Simazine-2-hydroxy        | Imidacloprid olefin          | Propoxur      |
|                                       | 1,2,3-trichlorobenzene                     | Carbofuran-3-             | Imidacloprid urea            | Pyrimethanil  |
|                                       | 1,2,3,4-tetrachlorobenzene                 | hydroxy                   | Indoxacarb                   | Sebuthylazine |
|                                       | 1,2,3,5+1,2,4,5-tetrachlorobenzene         | 6-chloronicotinic acid    | Isoproturon                  | Simazine      |
|                                       | Diclobenil                                 | Acetamiprid               | Isoproturon-desmethyl        | Simetryn      |
|                                       | Quintozene-pentachloroaniline              | Acetochlor                | Isoproturon-monodesmethyl    | Tebuconazole  |
|                                       | 2-monochlorophenol                         | Alachlor                  | Cadusafos                    | Terbutylazine |
|                                       | 3-monochlorophenol                         | Aldicarb                  | Carbaryl                     | Thiacloprid   |
|                                       | 4-monochlorophenol                         | Aldicarb sulfone          | Carbofuran                   | Thiamethoxam  |
|                                       | 2,3-dichlorophenol                         | Aldicarb sulfoxide        | Clomazone                    | Pentanedial   |
|                                       | 2,4 + 2,5-dichlorophenol                   | Ametryn                   | Chlorfenvinphos              | DeBB          |
|                                       | 2,6-dichlorophenol                         | Atrazine                  | Chloridazon                  | HBCD          |
|                                       | 3,4-dichlorophenol                         | Azoxystrobin              | Chloridazon-desphenyl        | PFHpA         |
|                                       | 3,5-dichlorophenol                         | Boscalid                  | Chloridazon-methyl-desphenyl | PFOA          |
|                                       | 2,3,4-trichlorophenol                      | Cyanazine                 | Chlorpyrifos                 | PFNA          |
|                                       | 2,3,5-trichlorophenol                      | Cyproconazole             | Chlorsulfuron                | PFDA          |
|                                       | 2,3,6-trichlorophenol                      | Atrazine-desethyl         | Chlortoluron                 | PFBS          |
|                                       | 2,4,5-trichlorophenol                      | Terbutylazine-desethyl    | Clothadinin                  | PFHxS         |
|                                       | 2,4,6-trichlorophenol                      | Atrazine-desisopropyl     | Kresoxim-methyl              | PFHpS         |
|                                       | 3,4,5-trichlorophenol                      | Desmetryn                 | Linuron                      | 6:2 FTS       |
|                                       | 2,3,5,6-tetrachlorophenol                  | Diazinon                  | Malaixon                     | 8:2 FTS       |
|                                       | 2,3,4,5-tetrachlorophenol                  | Difenacoum                | Malathion                    | PFTTrDA       |
|                                       | 2,3,4,6-tetrachlorophenol                  | Diflufenican              | Metamitron                   | DEP           |
|                                       | Pentachlorophenol                          | Dichlorvos                | Metazachlor                  | DNPP          |
| Benzene                               | Dicrotophos                                | Methidathion              | DNHP                         |               |
| Ethylbenzene                          | Dimethoate                                 | Methiocarb                | TetBT                        |               |
| Xylene                                |                                            | Methiocarb sulfone        | TCHT                         |               |
|                                       |                                            |                           | TPhT                         |               |
| <b>0 &lt; f<sub>quant</sub> ≤ 25%</b> | C <sub>8</sub> -C <sub>10</sub> Aromatics  | Hexachlorobenzene         | Propional                    | FOSA          |
|                                       | C <sub>16</sub> -C <sub>35</sub> Aromatics | Toluene                   | Butanal                      | PFTeDA        |
|                                       | F                                          | o,p'-DDT                  | BDE 28                       | MeFOSA        |
|                                       | BkF                                        | p,p'-DDT                  | BDE 47                       | EtFOSA        |
|                                       | DahA                                       | o,p'-DDD                  | BDE 99                       | MeFOSE        |
|                                       | Hexachloroethane                           | p,p'-DDD                  | BDE 100                      | EtFOSE        |
|                                       | Cis-1,2-dichloroethene                     | o,p'-DDE                  | BDE 153                      | DMP           |
|                                       | 1,1,2-trichloroethane                      | p,p'-DDE                  | BDE 154                      | DPP           |
|                                       | Tetrachloroethene                          | Terbutylazine-desethyl-2- | TBBP-A                       | DBP           |
|                                       | 1,1-dichloroethene                         | hydroxy                   | PFBA                         | DiBP          |
|                                       | 1,2-dichlorobenzene                        | Hydroxy-                  | PFPeA                        | DNOP          |
|                                       | 1,3-dichlorobenzene                        | terbutylazine             | PFHxA                        | BBP           |
|                                       | 1,4-dichlorobenzene                        | Carbendazim               | PFUnDA                       | DCP           |
|                                       | 1,2,4-trichlorobenzene                     | Propiconazole             | PFDoDA                       | MPhT          |
|                                       | 1,3,5-trichlorobenzene                     | Terbutryn                 | PFDS                         | DPhT          |
|                                       | Pentachlorobenzene                         |                           |                              |               |

| Frequency                      | Substances                                  |              |              |      |
|--------------------------------|---------------------------------------------|--------------|--------------|------|
| 25 < f <sub>quant</sub> ≤ 50%  | C <sub>10</sub> -C <sub>12</sub> Aliphatics | Chry         | PCB 28       | DiDP |
|                                | C <sub>10</sub> -C <sub>16</sub> Aromatics  | BbF          | PFOS         | DiNP |
|                                | Phen                                        | BaP          | OP           | TBT  |
|                                | Fluo                                        | BPer         | NP           | MOT  |
|                                | BaA                                         | IP           | DBP          | DOT  |
| 50 < f <sub>quant</sub> ≤ 75%  | C <sub>12</sub> -C <sub>16</sub> Aliphatics | PCB 101      | PCB 138      | MBT  |
|                                | Pyr                                         | PCB 118      | PCB 180      | DBT  |
|                                | PCB 52                                      | PCB 153      | DEHP         |      |
| 75 < f <sub>quant</sub> < 100% | C <sub>16</sub> -C <sub>35</sub> Aliphatics | Formaldehyde | Acetaldehyde |      |

**Table S2: List of substances by frequency of quantification in stormwater pond sediments, n=32**

### III. Summary of quantified substances

| Substance group                         | Substance                                              | f <sub>quant</sub> (%) | Concentrations |         |         |
|-----------------------------------------|--------------------------------------------------------|------------------------|----------------|---------|---------|
|                                         |                                                        |                        | Median         | Minimum | Maximum |
| Hydrocarbons                            | C <sub>10</sub> -C <sub>12</sub> Aliphatics (mg/kg TS) | 41%                    | <10            | <10     | 146     |
|                                         | C <sub>12</sub> -C <sub>16</sub> Aliphatics (mg/kg TS) | 53%                    | 11.5           | <10     | 285     |
|                                         | C <sub>5</sub> -C <sub>16</sub> Aliphatics (mg/kg TS)  | 53%                    | 18             | <11     | 410     |
|                                         | C <sub>16</sub> -C <sub>35</sub> Aliphatics (mg/kg TS) | 97%                    | 205            | <10     | 3820    |
|                                         | C <sub>8</sub> -C <sub>10</sub> Aromatics (mg/kg TS)   | 16%                    | <0.48          | <0.095  | 1.8     |
|                                         | C <sub>10</sub> -C <sub>16</sub> Aromatics (mg/kg TS)  | 28%                    | <1.24          | <0.085  | 1.24    |
|                                         | C <sub>16</sub> -C <sub>35</sub> Aromatics (mg/kg TS)  | 25%                    | <1             | <1      | 4.2     |
| Polycyclic aromatic hydrocarbons (PAHs) | F (mg/kg TS)                                           | 6%                     | <0.08          | <0.08   | 0.095   |
|                                         | Phen (mg/kg TS)                                        | 38%                    | <0.08          | <0.08   | 0.628   |
|                                         | Fluo (mg/kg TS)                                        | 50%                    | 0.0855         | <0.08   | 1.2     |
|                                         | Pyr (mg/kg TS)                                         | 53%                    | 0.109          | <0.08   | 1.41    |
|                                         | BaA (mg/kg TS)                                         | 38%                    | <0.08          | <0.08   | 0.464   |
|                                         | Chry (mg/kg TS)                                        | 41%                    | <0.08          | <0.08   | 0.395   |
|                                         | BbF (mg/kg TS)                                         | 50%                    | 0.0935         | <0.08   | 0.773   |
|                                         | BkF (mg/kg TS)                                         | 25%                    | <0.08          | <0.08   | 0.179   |
|                                         | BaP (mg/kg TS)                                         | 34%                    | <0.08          | <0.08   | 0.444   |
|                                         | DahA (mg/kg TS)                                        | 22%                    | <0.08          | <0.08   | 0.13    |
|                                         | BPer (mg/kg TS)                                        | 44%                    | <0.08          | <0.08   | 0.548   |
|                                         | IP (mg/kg TS)                                          | 31%                    | <0.08          | <0.08   | 0.328   |
|                                         | Sum of 16 PAH (mg/kg TS)                               | 53%                    | 0.64           | <0.2    | 6.4     |
|                                         | Carcinogenic PAH (mg/kg TS)                            | 50%                    | 0.28           | <0.11   | 2.6     |
|                                         | Sum other PAH (mg/kg TS)                               | 53%                    | 0.36           | <0.092  | 3.8     |
|                                         | Sum medium-weight PAH (mg/kg TS)                       | 53%                    | 0.215          | <0.092  | 3.2     |
| Sum high-weight PAH (mg/kg TS)          | 50%                                                    | 0.32                   | <0.11          | 3.2     |         |
| BTEX                                    | Toluene (mg/kg TS)                                     | 13%                    | <0.1           | <0.1    | 1.28    |
| Chlorinated aliphatics                  | Hexachloroethane (mg/kg TS)                            | 3%                     | <0.01          | <0.01   | 0.126   |
|                                         | Cis-1,2-dichloroethene (mg/kg TS)                      | 3%                     | <0.04          | <0.04   | 0.18    |
|                                         | 1,1,2-trichloroethane (mg/kg TS)                       | 3%                     | <0.01          | <0.01   | 0.125   |
|                                         | Tetrachloroethene (mg/kg TS)                           | 3%                     | <0.02          | <0.02   | 0.094   |
|                                         | 1,1-dichloroethene (mg/kg TS)                          | 3%                     | <0.01          | <0.01   | 0.167   |
| Chlorobenzenes                          | 1,2-dichlorobenzene (mg/kg TS)                         | 3%                     | <0.02          | <0.02   | 0.69    |
|                                         | 1,3-dichlorobenzene (mg/kg TS)                         | 3%                     | <0.02          | <0.02   | 0.22    |
|                                         | 1,4-dichlorobenzene (mg/kg TS)                         | 3%                     | <0.02          | <0.02   | 0.47    |
|                                         | 1,2,4-trichlorobenzene (mg/kg TS)                      | 3%                     | <0.03          | <0.03   | 0.31    |
|                                         | 1,3,5-trichlorobenzene (mg/kg TS)                      | 3%                     | <0.05          | <0.05   | 0.39    |
|                                         | Pentachlorobenzene (mg/kg TS)                          | 3%                     | <0.01          | <0.01   | 0.02    |
|                                         | sum tetra- and pentachlorobenzenes (mg/kg TS)          | 3%                     | <0.02          | <0.017  | 0.04    |
|                                         | Hexachlorobenzene (mg/kg TS)                           | 9%                     | <0.005         | <0.005  | 0.168   |
| Aldehydes                               | Formaldehyde (mg/kg TS)                                | 97%                    | 1.2            | <0.38   | 8.4     |
|                                         | Acetaldehyde (mg/kg TS)                                | 88%                    | 0.86           | <0.22   | 3.6     |
|                                         | Propional (mg/kg TS)                                   | 3%                     | <0.2           | <0.2    | 0.5     |
|                                         | Butanal (mg/kg TS)                                     | 6%                     | <0.2           | <0.2    | 0.5     |

| Substance group                   | Substance                | f <sub>quant</sub> (%) | Concentrations |         |         |
|-----------------------------------|--------------------------|------------------------|----------------|---------|---------|
|                                   |                          |                        | Median         | Minimum | Maximum |
| Polychlorinated Biphenyls (PCBs)  | PCB 28 (µg/kg TS)        | 28%                    | <0.1           | <0.1    | 2.2     |
|                                   | PCB 52 (µg/kg TS)        | 53%                    | 0.135          | <0.1    | 6.6     |
|                                   | PCB 101 (µg/kg TS)       | 75%                    | 0.415          | <0.1    | 20      |
|                                   | PCB 118 (µg/kg TS)       | 69%                    | 0.26           | <0.1    | 16      |
|                                   | PCB 153 (µg/kg TS)       | 75%                    | 0.865          | <0.1    | 24      |
|                                   | PCB 138 (µg/kg TS)       | 75%                    | 0.935          | <0.1    | 27      |
|                                   | PCB 180 (µg/kg TS)       | 72%                    | 0.7            | <0.1    | 25      |
|                                   | sum of 7 PCBs (µg/kg TS) | 75%                    | 3.2            | <0.4    | 100     |
| Alkylphenols                      | OP (mg/kg TS)            | 38%                    | <0.02          | <0.01   | 0.529   |
|                                   | NP (mg/kg TS)            | 38%                    | <0.1           | <0.1    | 30.5    |
| Phthalates                        | DMP (mg/kg TS)           | 3%                     | <0.05          | <0.05   | 0.099   |
|                                   | DPP (mg/kg TS)           | 6%                     | <0.05          | <0.05   | 0.7     |
|                                   | DiBP (mg/kg TS)          | 19%                    | <0.05          | <0.05   | 0.15    |
|                                   | DBP (mg/kg TS)           | 31%                    | <0.05          | <0.05   | 0.79    |
|                                   | DNOP (mg/kg TS)          | 22%                    | <0.0775        | <0.05   | 7       |
|                                   | DEHP (mg/kg TS)          | 66%                    | 1.3            | <0.05   | 33      |
|                                   | BBP (mg/kg TS)           | 6%                     | <0.05          | <0.05   | 0.2     |
|                                   | DCP (mg/kg TS)           | 22%                    | <0.05          | <0.05   | 0.84    |
|                                   | DiDP (mg/kg TS)          | 28%                    | <2.5           | <2.5    | 22      |
| DiNP (mg/kg TS)                   | 31%                      | <4                     | <2.5           | 430     |         |
| Brominated flame retardants       | BDE 28 (µg/kg TS)        | 3%                     | <0.26          | <0.032  | 0.7     |
|                                   | tetraBDE (µg/kg TS)      | 9%                     | <3.3           | <2      | 21      |
|                                   | BDE 47 (µg/kg TS)        | 22%                    | <0.335         | <0.16   | 21      |
|                                   | pentaBDE (µg/kg TS)      | 9%                     | <4             | <2.4    | 15      |
|                                   | BDE 99 (µg/kg TS)        | 25%                    | <0.425         | <0.18   | 11      |
|                                   | BDE 100 (µg/kg TS)       | 22%                    | <0.33          | <0.064  | 3.2     |
|                                   | BDE 153 (µg/kg TS)       | 9%                     | <0.275         | <0.13   | 1.4     |
|                                   | BDE 154 (µg/kg TS)       | 9%                     | <0.235         | <0.027  | 0.6     |
|                                   | decaBDE (µg/kg TS)       | 3%                     | <25.5          | <10     | 110     |
|                                   | TBBP-A (µg/kg TS)        | 9%                     | <5             | <5      | 6.66    |
| Perfluorinated substances (PFASs) | PFBA (µg/kg TS)          | 19%                    | <0.5           | <0.5    | 1.42    |
|                                   | PFPeA (µg/kg TS)         | 6%                     | <0.5           | <0.5    | 0.895   |
|                                   | PFHxA (µg/kg TS)         | 3%                     | <0.5           | <0.5    | 0.635   |
|                                   | PFUnDA (µg/kg TS)        | 3%                     | <0.5           | <0.5    | 0.872   |
|                                   | PFDoDA (µg/kg TS)        | 6%                     | <0.5           | <0.5    | 1.46    |
|                                   | PFOS (µg/kg TS)          | 44%                    | <0.5           | <0.5    | 3.18    |
|                                   | PFDS (µg/kg TS)          | 9%                     | <0.5           | <0.5    | 0.557   |
|                                   | FOSA (µg/kg TS)          | 9%                     | <0.5           | <0.5    | 0.994   |
|                                   | PFTeDA (µg/kg TS)        | 6%                     | <0.5           | <0.5    | 1.35    |
|                                   | MeFOSA (µg/kg TS)        | 3%                     | <0.5           | <0.5    | 0.584   |
|                                   | EtFOSA (µg/kg TS)        | 9%                     | <0.5           | <0.5    | 0.735   |
|                                   | MeFOSE (µg/kg TS)        | 3%                     | <0.5           | <0.5    | 0.825   |
|                                   | EtFOSE (µg/kg TS)        | 13%                    | <0.5           | <0.5    | 1.19    |

| Substance group | Substance                                   | f <sub>quant</sub><br>(%) | Concentrations |         |         |
|-----------------|---------------------------------------------|---------------------------|----------------|---------|---------|
|                 |                                             |                           | Median         | Minimum | Maximum |
| Organotins      | MBT (µg/kg TS)                              | 66%                       | 12             | <1      | 231     |
|                 | DBT (µg/kg TS)                              | 69%                       | 12             | <1      | 781     |
|                 | TBT (µg/kg TS)                              | 44%                       | <1             | <1      | 31.3    |
|                 | MOT (µg/kg TS)                              | 47%                       | <1             | <1      | 23.4    |
|                 | DOT (µg/kg TS)                              | 47%                       | <1             | <1      | 40.7    |
|                 | MPhT (µg/kg TS)                             | 13%                       | <1             | <1      | 10.1    |
|                 | DPhT (µg/kg TS)                             | 6%                        | <1             | <1      | 2.69    |
| Pesticides      | o,p'-DDT (mg/kg TS)                         | 3%                        | <0.01          | <0.01   | 0.25    |
|                 | p,p'-DDT (mg/kg TS)                         | 6%                        | <0.01          | <0.01   | 1.58    |
|                 | o,p'-DDD (mg/kg TS)                         | 3%                        | <0.01          | <0.01   | 0.328   |
|                 | p,p'-DDD (mg/kg TS)                         | 3%                        | <0.01          | <0.01   | 0.869   |
|                 | o,p'-DDE (mg/kg TS)                         | 3%                        | <0.01          | <0.01   | 0.02    |
|                 | p,p'-DDE (mg/kg TS)                         | 3%                        | <0.01          | <0.01   | 0.216   |
|                 | Terbutylazine-desethyl-2-hydroxy (mg/kg TS) | 3%                        | <0.01          | <0.01   | 0.1     |
|                 | Hydroxy-terbutylazine (mg/kg TS)            | 3%                        | <0.01          | <0.01   | 0.1     |
|                 | Carbendazim (mg/kg TS)                      | 3%                        | <0.01          | <0.01   | 0.1     |
|                 | Propiconazole (mg/kg TS)                    | 6%                        | <0.01          | <0.01   | 0.1     |
|                 | Terbutryn (mg/kg TS)                        | 3%                        | <0.01          | <0.01   | 0.1     |

**Table S3: Frequency of quantification (f<sub>quant</sub>), minimal, maximal and median concentrations for compounds quantified in at least one sample**

**IV. Correlation test results between quantified concentrations of each substance and the total number of substances quantified in each sample**

| Substance                                    | f <sub>censored</sub> | P-value  | tau   |
|----------------------------------------------|-----------------------|----------|-------|
| C <sub>10</sub> -C <sub>12</sub> Aliphatics* | 0.59                  | 4.25E-07 | 0.542 |
| C <sub>12</sub> -C <sub>16</sub> Aliphatics* | 0.47                  | 2.07E-08 | 0.649 |
| C <sub>16</sub> -C <sub>35</sub> Aliphatics* | 0.03                  | 5.16E-09 | 0.726 |
| C <sub>10</sub> -C <sub>16</sub> Aromatics   | 0.72                  | 0.963    | 0.006 |
| C <sub>16</sub> -C <sub>35</sub> Aromatics*  | 0.75                  | 2.42E-05 | 0.373 |
| Phen*                                        | 0.63                  | 6.18E-07 | 0.520 |
| Fluo*                                        | 0.50                  | 1.01E-08 | 0.653 |
| Pyr*                                         | 0.47                  | 2.6E-09  | 0.690 |
| BaA*                                         | 0.63                  | 2.22E-07 | 0.540 |
| Chry*                                        | 0.59                  | 2.86E-07 | 0.550 |
| BbF*                                         | 0.50                  | 1.25E-08 | 0.649 |
| BkF*                                         | 0.75                  | 4.02E-05 | 0.363 |
| BaP*                                         | 0.66                  | 4.01E-07 | 0.512 |
| BPer*                                        | 0.56                  | 2.63E-08 | 0.611 |
| IP*                                          | 0.69                  | 5.76E-06 | 0.442 |
| Formaldehyde*                                | 0.03                  | 0.00175  | 0.389 |
| Acetaldehyde*                                | 0.13                  | 0.00398  | 0.357 |
| BDE 99*                                      | 0.75                  | 0.00278  | 0.359 |
| PCB28*                                       | 0.72                  | 0.00062  | 0.369 |
| PCB52*                                       | 0.47                  | 3.18E-09 | 0.685 |
| PCB101*                                      | 0.25                  | 5.37E-10 | 0.762 |
| PCB118*                                      | 0.31                  | 7.17E-09 | 0.704 |
| PCB153*                                      | 0.25                  | 7E-11    | 0.800 |
| PCB138*                                      | 0.25                  | 5.62E-11 | 0.804 |
| PCB180*                                      | 0.28                  | 9.11E-11 | 0.792 |
| sum of 7 PCBs*                               | 0.25                  | 4.55E-11 | 0.808 |
| PFOS*                                        | 0.56                  | 5.9E-05  | 0.442 |
| OP*                                          | 0.63                  | 1.49E-05 | 0.500 |
| NP*                                          | 0.63                  | 3.87E-07 | 0.542 |
| DBP*                                         | 0.69                  | 0.00017  | 0.389 |
| DEHP*                                        | 0.34                  | 4.19E-09 | 0.710 |
| DiDP*                                        | 0.72                  | 0.00681  | 0.300 |
| DiNP*                                        | 0.69                  | 0.00406  | 0.329 |
| Monobutyltin*                                | 0.34                  | 7.67E-09 | 0.698 |
| Dibutyltin*                                  | 0.31                  | 2.16E-09 | 0.728 |
| Tributyltin*                                 | 0.56                  | 0.000127 | 0.421 |
| Monooctyltin*                                | 0.53                  | 2.94E-06 | 0.524 |
| Diocetyl tin*                                | 0.53                  | 1.23E-07 | 0.593 |

**Table S4:** Results of the Kendall's tau test between censored substance concentrations, n=32. Significant correlations, considering  $\alpha=0.01$  are marked with a \*. The test was only computed for substances quantified in at least 8 of the 32 analyzed samples ( $f_{\text{cens}} \leq 75\%$  censored).



## V. Statistics addressing inter-site variability

| Substance                                   | $f_{\text{censored}}$ | Inter-site factor of variation |
|---------------------------------------------|-----------------------|--------------------------------|
| C <sub>10</sub> -C <sub>12</sub> Aliphatics | 0.60                  | 14.6                           |
| C <sub>12</sub> -C <sub>16</sub> Aliphatics | 0.50                  | 28.5                           |
| C <sub>16</sub> -C <sub>35</sub> Aliphatics | 0.03                  | 382                            |
| C <sub>10</sub> -C <sub>16</sub> Aromatics  | 0.73                  | 14.6                           |
| Phen                                        | 0.63                  | 7.9                            |
| Fluo                                        | 0.50                  | 15.0                           |
| Pyr                                         | 0.50                  | 17.6                           |
| BaA                                         | 0.63                  | 5.8                            |
| Chry                                        | 0.60                  | 4.9                            |
| BbF                                         | 0.53                  | 5.6                            |
| BaP                                         | 0.67                  | 5.6                            |
| BPer                                        | 0.57                  | 6.9                            |
| IP                                          | 0.70                  | 4.1                            |
| Formaldehyde                                | 0.03                  | 22.1                           |
| Acetaldehyde                                | 0.13                  | 16.4                           |
| PCB28                                       | 0.73                  | 22.0                           |
| PCB52                                       | 0.47                  | 66.0                           |
| PCB101                                      | 0.27                  | 200                            |
| PCB118                                      | 0.30                  | 160                            |
| PCB153                                      | 0.27                  | 240                            |
| PCB138                                      | 0.27                  | 270                            |
| PCB180                                      | 0.30                  | 250                            |
| PFOS                                        | 0.60                  | 6.4                            |
| OP                                          | 0.63                  | 52.9                           |
| NP                                          | 0.63                  | 305                            |
| DBP                                         | 0.70                  | 15.8                           |
| DEHP                                        | 0.37                  | 660                            |
| DiDP                                        | 0.70                  | 40.0                           |
| DiNP                                        | 0.67                  | 172                            |
| Monobutyltin                                | 0.37                  | 231                            |
| Dibutyltin                                  | 0.33                  | 781                            |
| Tributyltin                                 | 0.60                  | 31.3                           |
| Monooctyltin                                | 0.57                  | 23.4                           |
| Diocetyl tin                                | 0.57                  | 40.7                           |

**Table S5:** Summary of factors of variability within ponds for substances quantified in at least 25% of samples

| Substance                                   | $f_{\text{censored}}$ | P-value (all) | P-value (IC-Res) | P-value (IC-Ro) | P-value (Res-Ro) |
|---------------------------------------------|-----------------------|---------------|------------------|-----------------|------------------|
| C <sub>10</sub> -C <sub>12</sub> Aliphatics | 0.60                  | 0.030         | <b>0.0013</b>    | 0.91            | <b>0.0013</b>    |
| C <sub>12</sub> -C <sub>16</sub> Aliphatics | 0.50                  | 0.12          | <b>0.0071</b>    | 0.83            | <b>0.0071</b>    |
| C <sub>16</sub> -C <sub>35</sub> Aliphatics | 0.03                  | 0.042         | <b>0.00080</b>   | 0.60            | <b>0.00082</b>   |
| C <sub>10</sub> -C <sub>16</sub> Aromatics  | 0.73                  | 0.018         | 1                | <b>0.0047</b>   | 1                |
| Phen                                        | 0.63                  | 0.011         | <b>0.0013</b>    | 0.18            | <b>0.0013</b>    |
| Fluo                                        | 0.50                  | 0.041         | <b>0.00082</b>   | 0.38            | <b>0.00082</b>   |
| Pyr                                         | 0.50                  | 0.041         | <b>0.00032</b>   | 0.35            | <b>0.00032</b>   |
| BaA                                         | 0.63                  | 0.14          | 0.045            | 0.75            | 0.045            |
| Chry                                        | 0.60                  | 0.22          | 0.054            | 0.69            | 0.054            |
| BbF                                         | 0.53                  | 0.15          | 0.013            | 0.59            | 0.013            |
| BaP                                         | 0.67                  | 0.12          | 0.58             | 0.46            | 0.578515         |
| BPer                                        | 0.57                  | 0.049         | <b>0.0026</b>    | 0.67            | <b>0.0026</b>    |
| IP                                          | 0.70                  | 0.082         | 0.046            | 0.75            | 0.046            |
| Formaldehyde                                | 0.03                  | 0.42          | 0.19             | 0.32            | 0.19             |
| Acetaldehyde                                | 0.13                  | 0.48          | 0.80             | 0.48            | 0.80             |
| PCB28                                       | 0.73                  | 0.048         | 0.011            | 0.10            | 0.011            |
| PCB52                                       | 0.47                  | 0.054         | <b>0.0071</b>    | 0.19            | <b>0.0071</b>    |
| PCB101                                      | 0.27                  | 0.15          | 0.012            | 0.31            | 0.012            |
| PCB118                                      | 0.30                  | 0.12          | <b>0.0038</b>    | 0.31            | <b>0.0038</b>    |
| PCB153                                      | 0.27                  | 0.21          | 0.012            | 0.52            | 0.012            |
| PCB138                                      | 0.27                  | 0.29          | 0.026            | 0.63            | 0.026            |
| PCB180                                      | 0.30                  | 0.25          | 0.033            | 0.60            | 0.033            |
| PFOS                                        | 0.60                  | 0.48          | 0.19             | 0.63            | 0.19             |
| OP                                          | 0.63                  | <b>0.0022</b> | <b>0.0094</b>    | 0.04            | <b>0.0094</b>    |
| NP                                          | 0.63                  | 0.027         | 0.046            | 0.39            | 0.046            |
| DBP                                         | 0.70                  | 0.27          | 0.12             | 0.22            | 0.12             |
| DEHP                                        | 0.37                  | 0.11          | <b>0.0069</b>    | 0.35            | <b>0.0069</b>    |
| DiDP                                        | 0.70                  | 0.37          | <b>0.0027</b>    | 0.76            | <b>0.0027</b>    |
| DiNP                                        | 0.67                  | 0.037         | <b>0.0076</b>    | 0.12            | <b>0.0076</b>    |
| Monobutyltin                                | 0.37                  | 0.013         | <b>0.0018</b>    | 0.10            | <b>0.0018</b>    |
| Dibutyltin                                  | 0.33                  | 0.081         | <b>0.0035</b>    | 0.36            | <b>0.0035</b>    |
| Tributyltin                                 | 0.60                  | 0.18          | 0.054            | 0.63            | 0.053592         |
| Monooctyltin                                | 0.57                  | 0.039         | <b>0.0045</b>    | 0.24            | <b>0.0045</b>    |
| Diocetyl tin                                | 0.57                  | 0.040         | <b>0.0026</b>    | 0.76            | <b>0.0026</b>    |

**Table S6:** Results of the Peto&Peto generalized Wilcoxon test for differences between substance concentrations observed in each city,  $n=32$ ,  $n_{IC}=18$ ,  $n_{Res}=9$ ,  $n_{Ro}=5$ . P-values for significant differences, considering  $\alpha=0.01$ , are in bold. The tests were only computed for substances for which  $f_{\text{censored}} < 75\%$ .

| Substance                                   | f <sub>censored</sub> | P-value<br>(Catchment<br>area) | P-value<br>(Ratio facility<br>to catchment) | P-value<br>(Facility<br>age) | P-value<br>(Sediment<br>age) | P-value<br>(Imperviousness) |
|---------------------------------------------|-----------------------|--------------------------------|---------------------------------------------|------------------------------|------------------------------|-----------------------------|
| C <sub>10</sub> -C <sub>12</sub> Aliphatics | 0.60                  | 0.54                           | 0.44                                        | 0.068                        | 0.068                        | 0.077                       |
| C <sub>12</sub> -C <sub>16</sub> Aliphatics | 0.50                  | 0.70                           | 0.36                                        | 0.11                         | 0.25                         | 0.16                        |
| C <sub>16</sub> -C <sub>35</sub> Aliphatics | 0.03                  | 1                              | 0.41                                        | 0.011                        | 0.044                        | 0.073                       |
| C <sub>10</sub> -C <sub>16</sub> Aromatics  | 0.73                  | 0.81                           | 0.73                                        | 0.84                         | 0.84                         | 0.86                        |
| Phen                                        | 0.63                  | 0.22                           | 0.85                                        | 0.13                         | 0.22                         | 0.19                        |
| Fluo                                        | 0.50                  | 0.62                           | 0.41                                        | 0.18                         | 0.097                        | 0.14                        |
| Pyr                                         | 0.50                  | 0.64                           | 0.46                                        | 0.24                         | 0.085                        | 0.23                        |
| BaA                                         | 0.63                  | 0.73                           | 0.49                                        | 0.21                         | 0.063                        | 0.25                        |
| Chry                                        | 0.60                  | 0.93                           | 0.34                                        | 0.31                         | 0.071                        | 0.22                        |
| BbF                                         | 0.53                  | 0.83                           | 0.40                                        | 0.22                         | 0.057                        | 0.20                        |
| BaP                                         | 0.67                  | 0.81                           | 0.38                                        | 0.27                         | <b>0.0078</b>                | 0.11                        |
| BPer                                        | 0.57                  | 0.58                           | 0.61                                        | 0.11                         | 0.043                        | 0.11                        |
| IP                                          | 0.70                  | 0.94                           | 0.59                                        | 0.096                        | <b>0.0053</b>                | 0.28                        |
| Formaldehyde                                | 0.03                  | 0.86                           | 0.50                                        | 0.042                        | 0.021                        | 0.35                        |
| Acetaldehyde                                | 0.13                  | 0.76                           | 0.79                                        | 0.081                        | <b>0.0013</b>                | 0.25                        |
| PCB28                                       | 0.73                  | 0.84                           | 0.51                                        | 0.65                         | 0.53                         | 0.59                        |
| PCB52                                       | 0.47                  | 0.71                           | 0.25                                        | 0.19                         | 0.32                         | 0.034                       |
| PCB101                                      | 0.27                  | 0.51                           | 0.05                                        | 0.058                        | 0.58                         | 0.33                        |
| PCB118                                      | 0.30                  | 0.66                           | 0.14                                        | 0.077                        | 0.32                         | 0.39                        |
| PCB153                                      | 0.27                  | 0.51                           | 0.05                                        | 0.045                        | 0.49                         | 0.25                        |
| PCB138                                      | 0.27                  | 0.36                           | 0.03                                        | 0.063                        | 0.54                         | 0.28                        |
| PCB180                                      | 0.30                  | 0.36                           | 0.04                                        | 0.044                        | 0.38                         | 0.21                        |
| PFOS                                        | 0.60                  | 0.66                           | 0.10                                        | 0.36                         | 0.81                         | 0.44                        |
| OP                                          | 0.63                  | 0.18                           | 0.98                                        | 0.22                         | 0.25                         | 0.077                       |
| NP                                          | 0.63                  | 1                              | 0.41                                        | 0.078                        | 0.012                        | 0.087                       |
| DBP                                         | 0.70                  | 0.87                           | 0.29                                        | 0.50                         | 0.80                         | 0.57                        |
| DEHP                                        | 0.37                  | 0.87                           | 0.07                                        | 0.077                        | 0.75                         | 0.12                        |
| DiDP                                        | 0.70                  | 0.64                           | 0.42                                        | 0.041                        | 0.22                         | 0.039                       |
| DiNP                                        | 0.67                  | 0.84                           | 0.61                                        | 0.10                         | 0.12                         | 0.045                       |
| Monobutyltin                                | 0.37                  | 0.45                           | 0.64                                        | 0.027                        | 0.12                         | 0.13                        |
| Dibutyltin                                  | 0.33                  | 0.75                           | 0.30                                        | 0.014                        | 0.11                         | 0.21                        |
| Tributyltin                                 | 0.60                  | 0.38                           | 1                                           | 0.034                        | 0.22                         | 1                           |
| Monoctyltin                                 | 0.57                  | 0.27                           | 0.89                                        | 0.022                        | 0.027                        | 0.13                        |
| Diocetyl tin                                | 0.57                  | 0.50                           | 0.87                                        | 0.12                         | 0.072                        | 0.064                       |

**Table S7: Results of Kendall's tau test for correlation between censored concentrations and catchment and facility properties, n=30 for all except imperviousness for which n=21 P-values for significant correlations, considering  $\alpha=0.01$ , are in bold. The test was only computed for substances for which f<sub>censored</sub><75%.**

| Substance                                   | $f_{\text{censored}}$ | P-value (all)   | P-value (Or-Os) | P-value (Or-St) | P-value (Or-Va) | P-value (Os-St) | P-value (Os-Va) | P-value (St-Va) |
|---------------------------------------------|-----------------------|-----------------|-----------------|-----------------|-----------------|-----------------|-----------------|-----------------|
| C <sub>10</sub> -C <sub>12</sub> Aliphatics | 0.60                  | <b>0.0027</b>   | <b>6.3E-05</b>  | <b>0.0036</b>   | <b>0.00053</b>  | 0.17            | 0.77            | 0.42            |
| C <sub>12</sub> -C <sub>16</sub> Aliphatics | 0.50                  | <b>0.00030</b>  | <b>6.3E-05</b>  | <b>0.0013</b>   | <b>0.00021</b>  | 0.092           | 0.35            | 0.31            |
| C <sub>16</sub> -C <sub>35</sub> Aliphatics | 0.03                  | <b>1.6E-06</b>  | <b>6.3E-05</b>  | <b>2.7E-06</b>  | <b>4.6E-06</b>  | 0.041           | 0.77            | 0.062           |
| C <sub>10</sub> -C <sub>16</sub> Aromatics  | 0.73                  | 0.90            | 1               | 1               | 1               | 0.58            | 0.65            | 0.48            |
| Phen                                        | 0.63                  | 0.018           | 0.014           | <b>0.0036</b>   | <b>0.00053</b>  | 0.77            | 1               | 0.89            |
| Fluo                                        | 0.50                  | <b>0.0014</b>   | <b>6.3E-05</b>  | <b>8.6E-05</b>  | <b>0.00053</b>  | 0.92            | 0.42            | 0.75            |
| Pyr                                         | 0.50                  | <b>0.00056</b>  | <b>6.3E-05</b>  | <b>8.6E-05</b>  | <b>6.3E-05</b>  | 0.69            | 0.42            | 0.68            |
| BaA                                         | 0.63                  | <b>0.0095</b>   | 0.014           | <b>0.0036</b>   | <b>0.00053</b>  | 0.77            | 0.28            | 0.54            |
| Chry                                        | 0.60                  | <b>0.0044</b>   | 0.014           | <b>0.0012</b>   | <b>0.00053</b>  | 0.46            | 0.28            | 0.48            |
| BbF                                         | 0.53                  | <b>0.00059</b>  | <b>6.3E-05</b>  | <b>0.00035</b>  | <b>6.3E-05</b>  | 0.77            | 0.42            | 0.31            |
| BaP                                         | 0.67                  | <b>0.0083</b>   | <b>6.3E-05</b>  | 0.025           | <b>0.00053</b>  | 0.28            | 0.42            | 0.36            |
| BPer                                        | 0.57                  | <b>0.0027</b>   | <b>6.3E-05</b>  | <b>0.0012</b>   | <b>0.00053</b>  | 0.40            | 0.42            | 0.37            |
| IP                                          | 0.70                  | <b>0.0054</b>   | 0.014           | 0.025           | <b>0.00053</b>  | 0.91            | 0.28            | 0.12            |
| Formaldehyde                                | 0.03                  | <b>0.00024</b>  | 0.35            | <b>0.0040</b>   | <b>4.5E-05</b>  | 0.91            | 1               | 0.011           |
| Acetaldehyde                                | 0.13                  | <b>0.000018</b> | 0.063           | 0.24            | <b>2.3E-05</b>  | 0.46            | 0.88            | <b>0.00040</b>  |
| PCB28                                       | 0.73                  | 0.014           | 1               | <b>0.0012</b>   | 0.055           | 0.35            | 0.43            | 0.57            |
| PCB52                                       | 0.47                  | <b>0.00062</b>  | <b>6.3E-05</b>  | <b>1.7E-05</b>  | <b>0.00053</b>  | 0.85            | 0.89            | 0.79            |
| PCB101                                      | 0.27                  | <b>0.000087</b> | <b>6.3E-05</b>  | <b>2.7E-06</b>  | <b>0.00010</b>  | 0.85            | 0.42            | 0.55            |
| PCB118                                      | 0.30                  | <b>0.00037</b>  | <b>6.3E-05</b>  | <b>6.0E-06</b>  | <b>0.0013</b>   | 0.85            | 0.59            | 0.43            |
| PCB153                                      | 0.27                  | <b>0.000026</b> | <b>6.3E-05</b>  | <b>3.0E-06</b>  | <b>8.1E-06</b>  | 0.54            | 0.42            | 0.40            |
| PCB138                                      | 0.27                  | <b>0.000025</b> | <b>6.3E-05</b>  | <b>4.0E-06</b>  | <b>5.3E-06</b>  | 0.54            | 0.59            | 0.38            |
| PCB180                                      | 0.30                  | <b>0.000015</b> | <b>6.3E-05</b>  | <b>2.7E-06</b>  | <b>4.6E-06</b>  | 0.28            | 0.78            | 0.28            |
| PFOS                                        | 0.60                  | <b>0.0052</b>   | 0.014           | <b>0.0012</b>   | <b>6.3E-05</b>  | 1               | 0.88            | 0.82            |
| OP                                          | 0.63                  | <b>0.0099</b>   | <b>6.3E-05</b>  | <b>0.0098</b>   | <b>0.00053</b>  | 0.88            | 0.53            | 0.59            |
| NP                                          | 0.63                  | <b>0.0011</b>   | <b>6.3E-05</b>  | 0.025           | <b>6.3E-05</b>  | 0.17            | 0.77            | 0.15            |
| DBP                                         | 0.70                  | <b>0.0093</b>   | 1               | <b>0.0012</b>   | <b>0.0082</b>   | 0.19            | 0.27            | 0.77            |
| DEHP                                        | 0.37                  | <b>6.2E-05</b>  | <b>6.3E-05</b>  | <b>7.2E-06</b>  | <b>4.6E-06</b>  | 0.85            | 0.89            | 0.75            |
| DiDP                                        | 0.70                  | <b>0.0023</b>   | <b>6.3E-05</b>  | <b>0.0027</b>   | <b>0.0018</b>   | 0.18            | 0.92            | 0.32            |
| DiNP                                        | 0.67                  | <b>0.0027</b>   | <b>6.3E-05</b>  | <b>0.0024</b>   | <b>0.0031</b>   | 0.18            | 0.81            | 0.44            |
| Monobutyltin                                | 0.37                  | <b>7.7E-05</b>  | <b>6.3E-05</b>  | <b>3.1E-05</b>  | <b>4.6E-06</b>  | 1               | 0.42            | 0.44            |
| Dibutyltin                                  | 0.33                  | <b>7.2E-06</b>  | <b>6.3E-05</b>  | <b>4.5E-06</b>  | <b>4.6E-06</b>  | 0.85            | 0.42            | 0.093           |
| Tributyltin                                 | 0.60                  | <b>0.0011</b>   | 0.46            | 0.065           | <b>0.00056</b>  | 0.69            | 0.14            | 0.024           |
| Monoocetyl tin                              | 0.57                  | <b>0.00026</b>  | <b>6.3E-05</b>  | <b>0.0036</b>   | <b>4.6E-06</b>  | 0.27            | 0.55            | 0.17            |
| Diocetyl tin                                | 0.57                  | <b>3.3E-11</b>  | <b>6.3E-05</b>  | <b>0.0036</b>   | <b>4.6E-06</b>  | <b>0.00013</b>  | <b>0.0023</b>   | 0.49            |

**Table S8:** Results of the Peto&Peto generalized Wilcoxon test for differences between substance concentrations observed in each city,  $n=32$ ,  $n_{Os}=2$ ,  $n_{Or}=12$ ,  $n_{St}=11$ ,  $n_{Va}=7$ . P-values for significant differences, considering  $\alpha=0.01$ , are in bold. The tests were only computed for substances for which  $f_{\text{censored}} < 75\%$ .

## VI. Statistics comparing inlet and outlet concentrations

| Substance                                    | f <sub>censored</sub> | P-value | tau    |
|----------------------------------------------|-----------------------|---------|--------|
| C <sub>10</sub> -C <sub>12</sub> Aliphatics* | 0.60                  | 0.0052  | 0.381  |
| C <sub>12</sub> -C <sub>16</sub> Aliphatics* | 0.50                  | 0.0097  | 0.419  |
| C <sub>16</sub> -C <sub>35</sub> Aliphatics* | 0.03                  | 0.00063 | 0.667  |
| C <sub>10</sub> -C <sub>16</sub> Aromatics   | 0.73                  | 1       | -0.010 |
| Phen                                         | 0.63                  | 0.018   | 0.305  |
| Fluo*                                        | 0.50                  | 0.00093 | 0.533  |
| Pyr*                                         | 0.50                  | 0.00076 | 0.543  |
| BaA                                          | 0.63                  | 0.016   | 0.295  |
| Chry                                         | 0.60                  | 0.015   | 0.333  |
| BbF                                          | 0.53                  | 0.011   | 0.390  |
| BaP*                                         | 0.67                  | 0.00023 | 0.419  |
| BPer*                                        | 0.57                  | 0.0032  | 0.419  |
| IP                                           | 0.70                  | 0.015   | 0.257  |
| Formaldehyde                                 | 0.03                  | 0.164   | 0.276  |
| Acetaldehyde                                 | 0.13                  | 0.0198  | 0.448  |
| PCB28                                        | 0.73                  | 0.047   | 0.276  |
| PCB52*                                       | 0.47                  | 0.0021  | 0.514  |
| PCB101*                                      | 0.27                  | 0.00025 | 0.695  |
| PCB118*                                      | 0.30                  | 0.00066 | 0.638  |
| PCB153*                                      | 0.27                  | 4.6E-05 | 0.771  |
| PCB138*                                      | 0.27                  | 5.6E-05 | 0.762  |
| PCB180*                                      | 0.30                  | 0.00020 | 0.695  |
| PFOS*                                        | 0.60                  | 0.0061  | 0.448  |
| OP*                                          | 0.63                  | 0.0014  | 0.438  |
| NP                                           | 0.63                  | 0.014   | 0.305  |
| DBP*                                         | 0.70                  | 0.00023 | 0.667  |
| DEHP                                         | 0.37                  | 0.042   | 0.305  |
| DiDP                                         | 0.70                  | 0.043   | 0.314  |
| DiNP*                                        | 0.67                  | 0.00035 | 0.648  |
| Monobutyltin*                                | 0.37                  | 0.00055 | 0.638  |
| Dibutyltin*                                  | 0.33                  | 0.0065  | 0.371  |
| Tributyltin*                                 | 0.60                  | 0.0098  | 0.381  |
| Monooctyltin*                                | 0.57                  | 1.2E-05 | 0.638  |
| Diocetyl tin*                                | 0.57                  | 0.0061  | 0.448  |

**Table S9:** Results of the Kendall's tau test for correlation between censored inlet and outlet substance concentrations, n=15 paired inlet-outlet concentrations. Significant correlations considering  $\alpha=0.01$  are marked with a \*. The test was only computed for substances for which  $f_{\text{censored}} < 75\%$ .

| Substance                                   | $f_{\text{censored}}$ | Median factor of variation between inlet-outlet samples | Minimum factor of variation between inlet-outlet samples | Maximum factor of variation between inlet-outlet samples |
|---------------------------------------------|-----------------------|---------------------------------------------------------|----------------------------------------------------------|----------------------------------------------------------|
| C <sub>10</sub> -C <sub>12</sub> Aliphatics | 0.60                  | 1.0                                                     | 1.0                                                      | 14.6                                                     |
| C <sub>12</sub> -C <sub>16</sub> Aliphatics | 0.50                  | 1.0                                                     | 1.2                                                      | 21.7                                                     |
| C <sub>16</sub> -C <sub>35</sub> Aliphatics | 0.03                  | 1.1                                                     | 1.4                                                      | 17.4                                                     |
| C <sub>10</sub> -C <sub>16</sub> Aromatics  | 0.73                  | 1.0                                                     | 1.0                                                      | 5.7                                                      |
| Phen                                        | 0.63                  | 1.0                                                     | 1.0                                                      | 4.3                                                      |
| Fluo                                        | 0.50                  | 1.0                                                     | 1.1                                                      | 8.1                                                      |
| Pyr                                         | 0.50                  | 1.0                                                     | 1.0                                                      | 11.5                                                     |
| BaA                                         | 0.63                  | 1.0                                                     | 1.0                                                      | 3.1                                                      |
| Chry                                        | 0.60                  | 1.0                                                     | 1.1                                                      | 2.8                                                      |
| BbF                                         | 0.53                  | 1.0                                                     | 1.1                                                      | 7.7                                                      |
| BaP                                         | 0.67                  | 1.0                                                     | 1.0                                                      | 3.9                                                      |
| BPer                                        | 0.57                  | 1.0                                                     | 1.1                                                      | 6.2                                                      |
| IP                                          | 0.70                  | 1.0                                                     | 1.0                                                      | 4.1                                                      |
| Formaldehyde                                | 0.03                  | 1.0                                                     | 2.0                                                      | 14.5                                                     |
| Acetaldehyde                                | 0.13                  | 1.0                                                     | 1.5                                                      | 5.2                                                      |
| PCB28                                       | 0.73                  | 1.0                                                     | 1.0                                                      | 10.0                                                     |
| PCB52                                       | 0.47                  | 1.0                                                     | 1.1                                                      | 9.6                                                      |
| PCB101                                      | 0.27                  | 1.0                                                     | 1.3                                                      | 21.9                                                     |
| PCB118                                      | 0.30                  | 1.0                                                     | 1.1                                                      | 17.0                                                     |
| PCB153                                      | 0.27                  | 1.0                                                     | 1.2                                                      | 21.7                                                     |
| PCB138                                      | 0.27                  | 1.0                                                     | 1.2                                                      | 22.4                                                     |
| PCB180                                      | 0.30                  | 1.0                                                     | 1.1                                                      | 25.5                                                     |
| PFOS                                        | 0.60                  | 1.0                                                     | 1.0                                                      | 4.1                                                      |
| OP                                          | 0.63                  | 1.0                                                     | 1.0                                                      | 11.9                                                     |
| NP                                          | 0.63                  | 1.0                                                     | 1.0                                                      | 59.7                                                     |
| DBP                                         | 0.70                  | 1.0                                                     | 1.0                                                      | 4.0                                                      |
| DEHP                                        | 0.37                  | 1.0                                                     | 1.3                                                      | 27.9                                                     |
| DiDP                                        | 0.70                  | 1.0                                                     | 1.1                                                      | 6.0                                                      |
| DiNP                                        | 0.67                  | 1.0                                                     | 1.5                                                      | 39.1                                                     |
| Monobutyltin                                | 0.37                  | 1.0                                                     | 1.7                                                      | 15.1                                                     |
| Dibutyltin                                  | 0.33                  | 1.0                                                     | 1.8                                                      | 35.0                                                     |
| Tributyltin                                 | 0.60                  | 1.0                                                     | 1.1                                                      | 13.4                                                     |
| Monooctyltin                                | 0.57                  | 1.0                                                     | 1.1                                                      | 15.5                                                     |
| Diocetyl tin                                | 0.57                  | 1.0                                                     | 1.0                                                      | 3.9                                                      |

**Table S10:** Summary of factors of variability within ponds for substances quantified in at least 25% of samples

| Substance                                   | f <sub>censored</sub> | P-value |
|---------------------------------------------|-----------------------|---------|
| C <sub>10</sub> -C <sub>12</sub> Aliphatics | 0.60                  | 0.390   |
| C <sub>12</sub> -C <sub>16</sub> Aliphatics | 0.50                  | 0.990   |
| C <sub>16</sub> -C <sub>35</sub> Aliphatics | 0.03                  | 0.858   |
| C <sub>10</sub> -C <sub>16</sub> Aromatics  | 0.73                  | 0.410   |
| Phen                                        | 0.63                  | 0.569   |
| Fluo                                        | 0.50                  | 0.638   |
| Pyr                                         | 0.50                  | 0.661   |
| BaA                                         | 0.63                  | 0.293   |
| Chry                                        | 0.60                  | 0.461   |
| BbF                                         | 0.53                  | 0.506   |
| BaP                                         | 0.67                  | 0.456   |
| BPer                                        | 0.57                  | 0.289   |
| IP                                          | 0.70                  | 0.661   |
| Formaldehyde                                | 0.03                  | 0.749   |
| Acetaldehyde                                | 0.13                  | 0.608   |
| PCB28                                       | 0.73                  | 0.903   |
| PCB52                                       | 0.47                  | 0.813   |
| PCB101                                      | 0.27                  | 0.981   |
| PCB118                                      | 0.30                  | 0.780   |
| PCB153                                      | 0.27                  | 0.875   |
| PCB138                                      | 0.27                  | 0.931   |
| PCB180                                      | 0.30                  | 0.795   |
| PFOS                                        | 0.60                  | 0.322   |
| OP                                          | 0.63                  | 0.743   |
| NP                                          | 0.63                  | 0.842   |
| DBP                                         | 0.70                  | 0.767   |
| DEHP                                        | 0.37                  | 0.599   |
| DiDP                                        | 0.70                  | 0.756   |
| DiNP                                        | 0.67                  | 0.544   |
| Monobutyltin                                | 0.37                  | 0.811   |
| Dibutyltin                                  | 0.33                  | 0.892   |
| Tributyltin                                 | 0.60                  | 0.609   |
| Monooctyltin                                | 0.57                  | 0.813   |
| Diocyltin                                   | 0.57                  | 0.752   |

**Table S11:** Results of the paired Peto&Peto generalized Wilcoxon test for differences between censored inlet and outlet substance concentrations, n=15 pairs. Significant correlations, considering  $\alpha=0.01$  are marked with a \*. The test was only computed for substances for which f<sub>censored</sub><75%.

**VII. Photographs of different types of sediments**

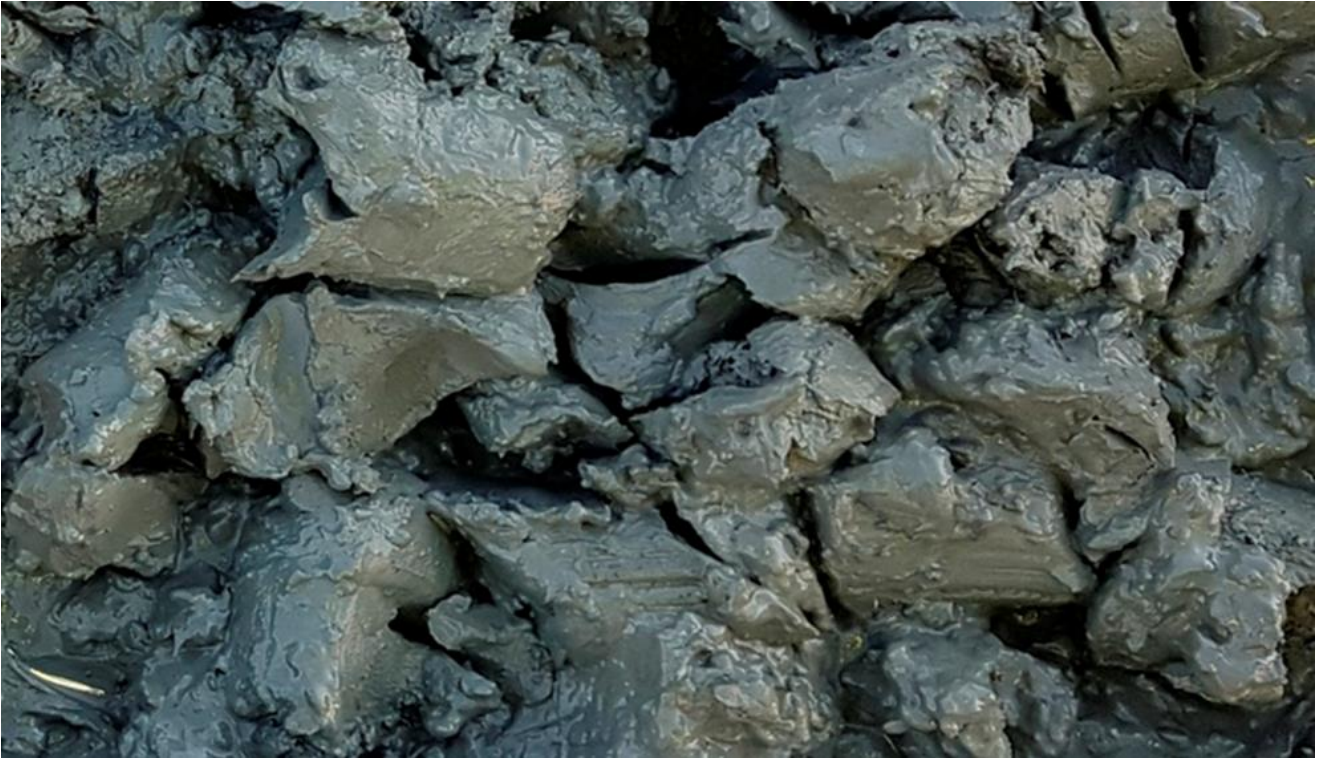

**Figure S1a.** Grey, clay sediments collected from pond Or-2

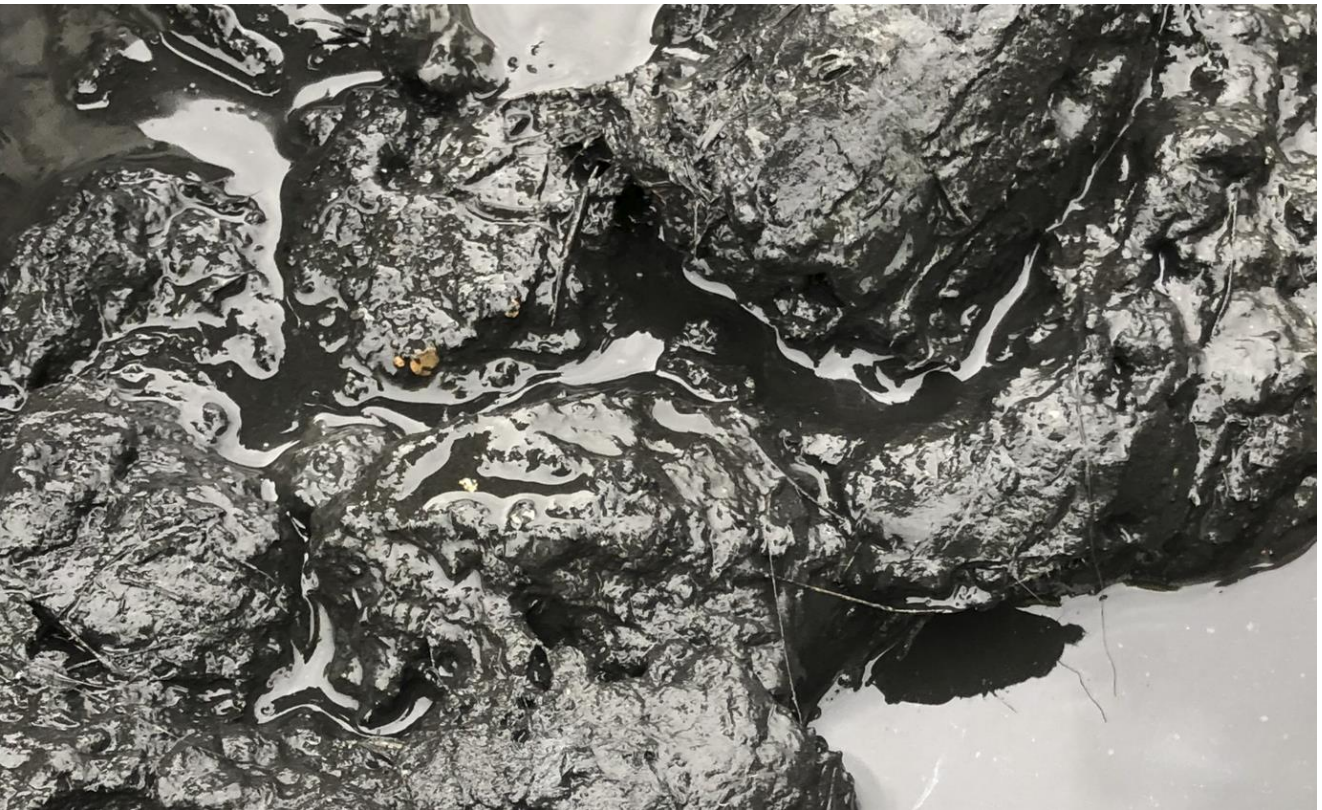

**Figure S1b.** Loose, black sediments collected from pond S-1.



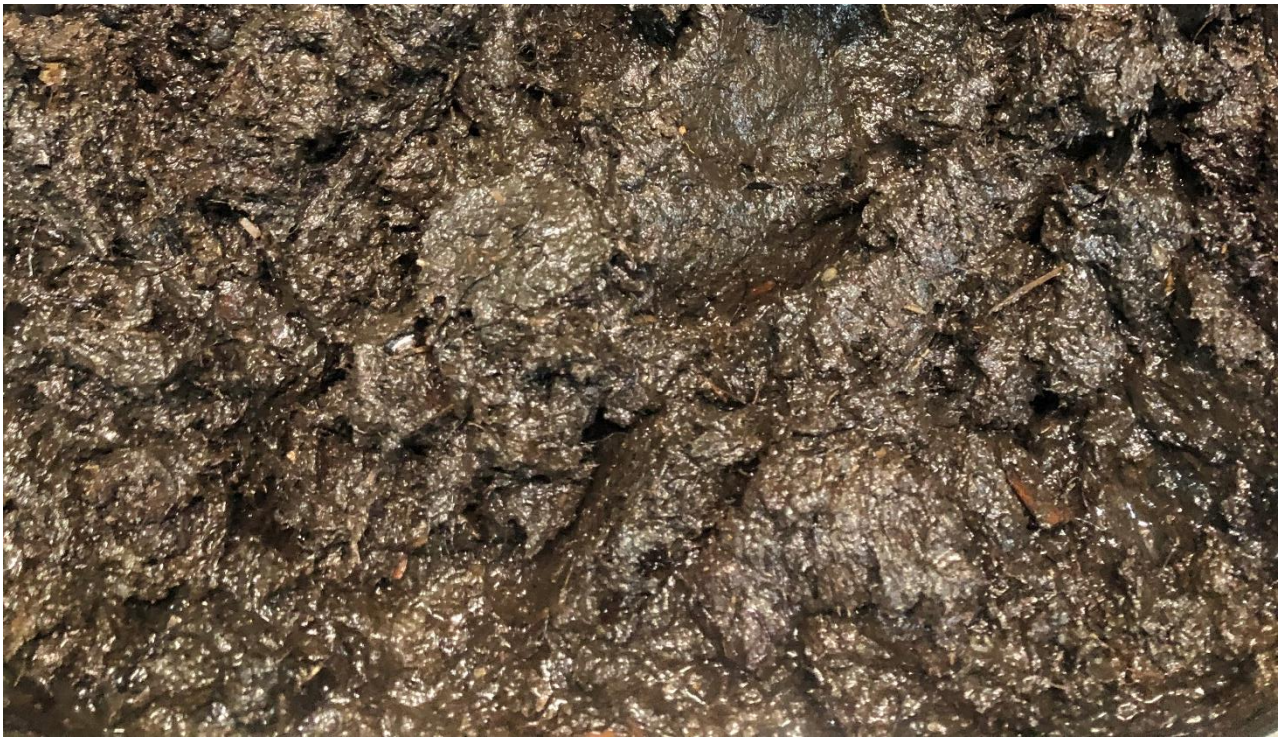

**Figure S3c.** Peat-like sediment collected from pond S-3

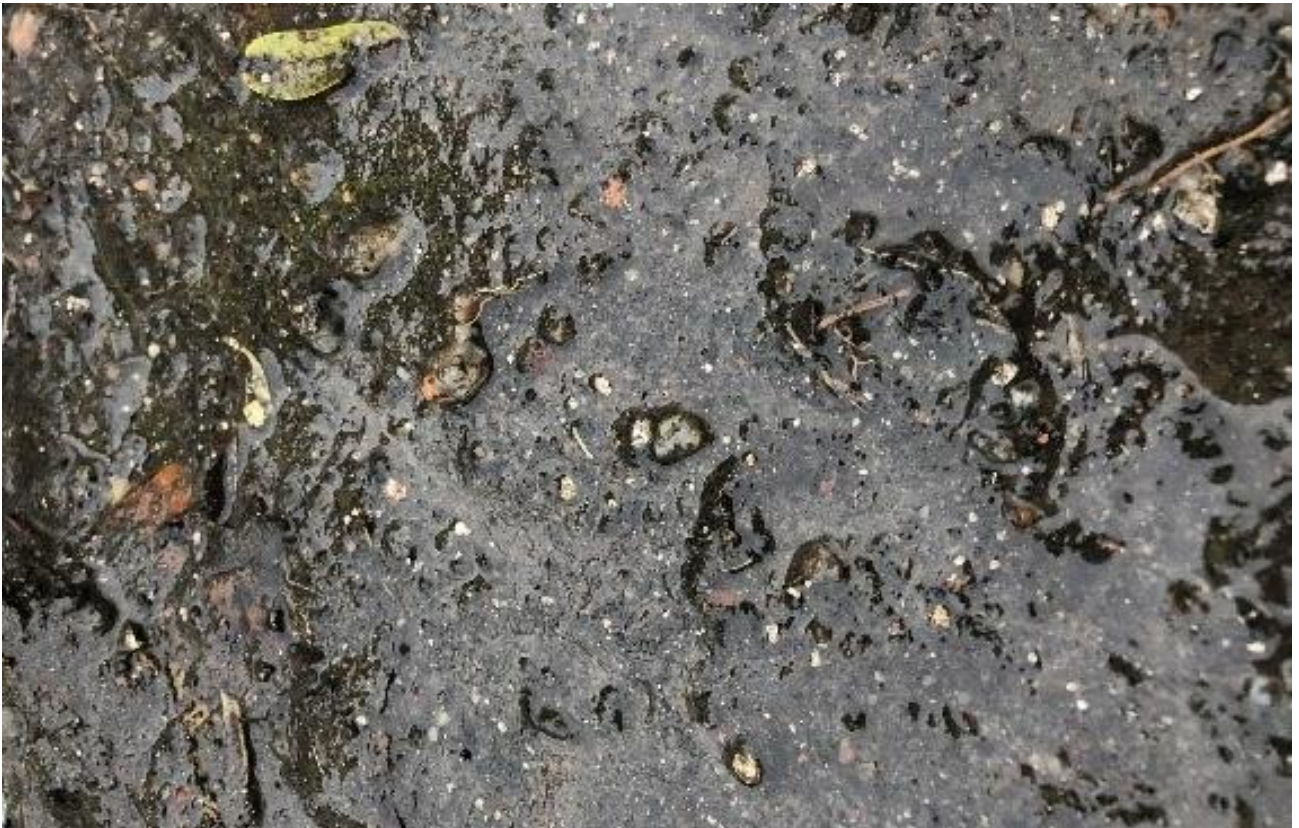

**Figure S1d.** Sandy sediment collected from pond S-5

### VIII. Regulatory limits exceeded by each sample

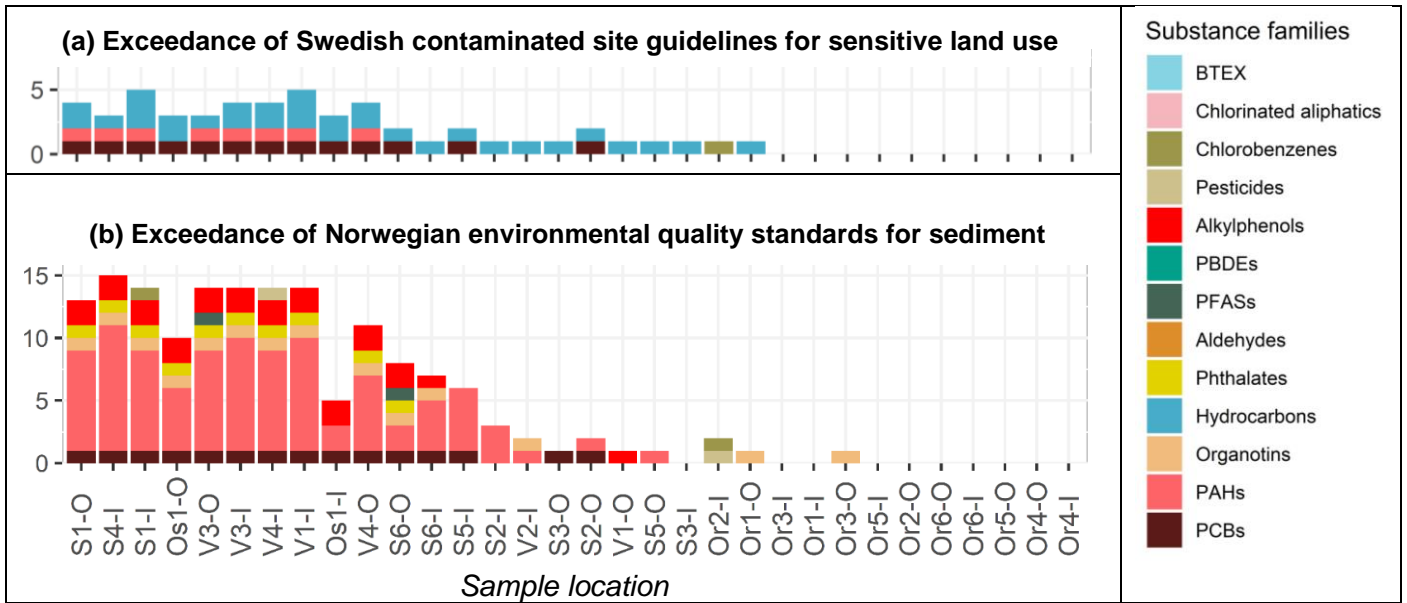

**Figure S2a.** Total number of quantified substances exceeding Swedish contaminated site guidelines for sensitive land use,<sup>50</sup> and **Figure S2b.** total number of quantified substances exceeding Norwegian environmental quality standards for sediment<sup>51</sup>



## IX. Ratios of observed concentrations to regulatory limits

Note: The following graphs present the ratios of substance concentrations quantified in the stormwater sediments to corresponding environmental standards. Substances below the limit of quantification are not included in this graph. The two standard systems (Swedish contaminated site guidelines and Norwegian environmental quality standards for sediment) do not apply to the same lists of substances; in some cases, standards apply to several substances within a family.

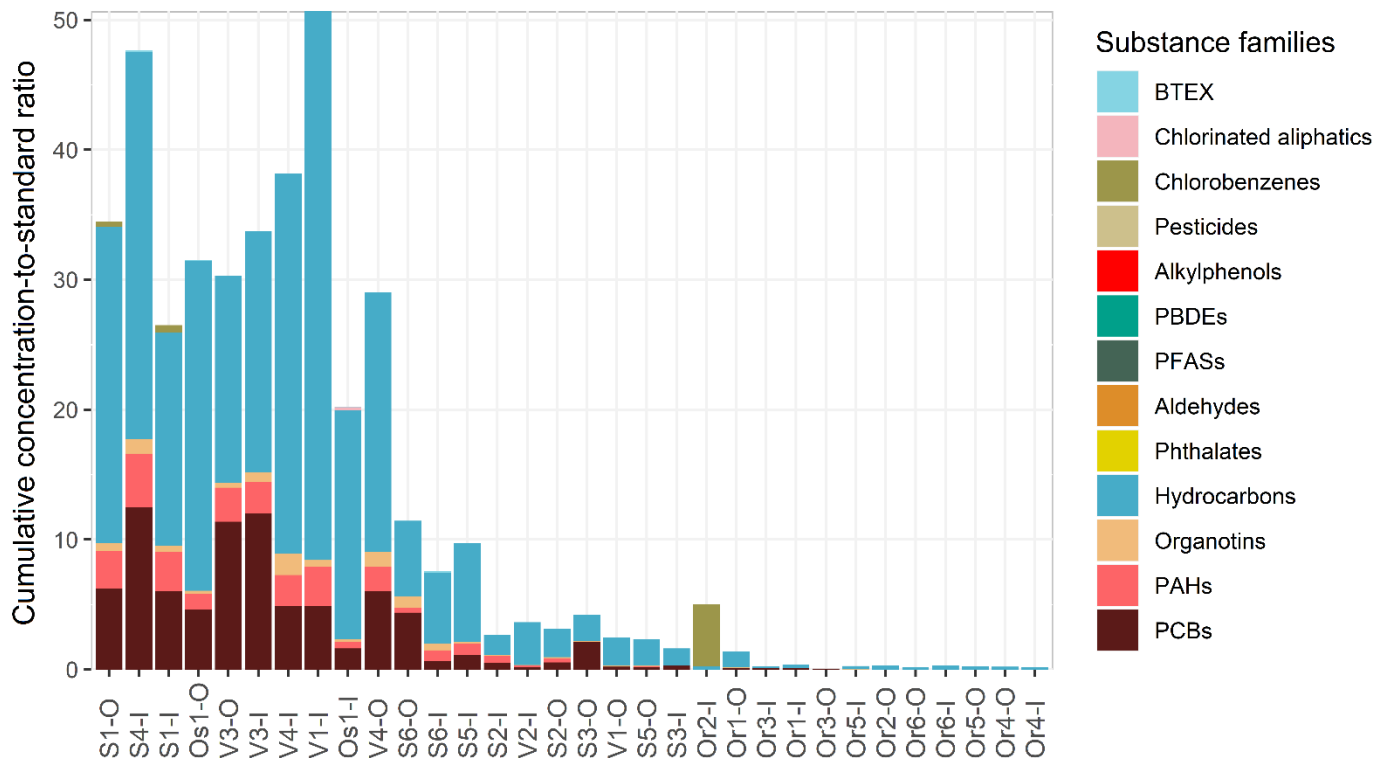

Figure S3a. Sum of ratios of quantified substance concentrations to Swedish contaminated site guidelines for sensitive land use,<sup>46</sup> sorted by substance family.

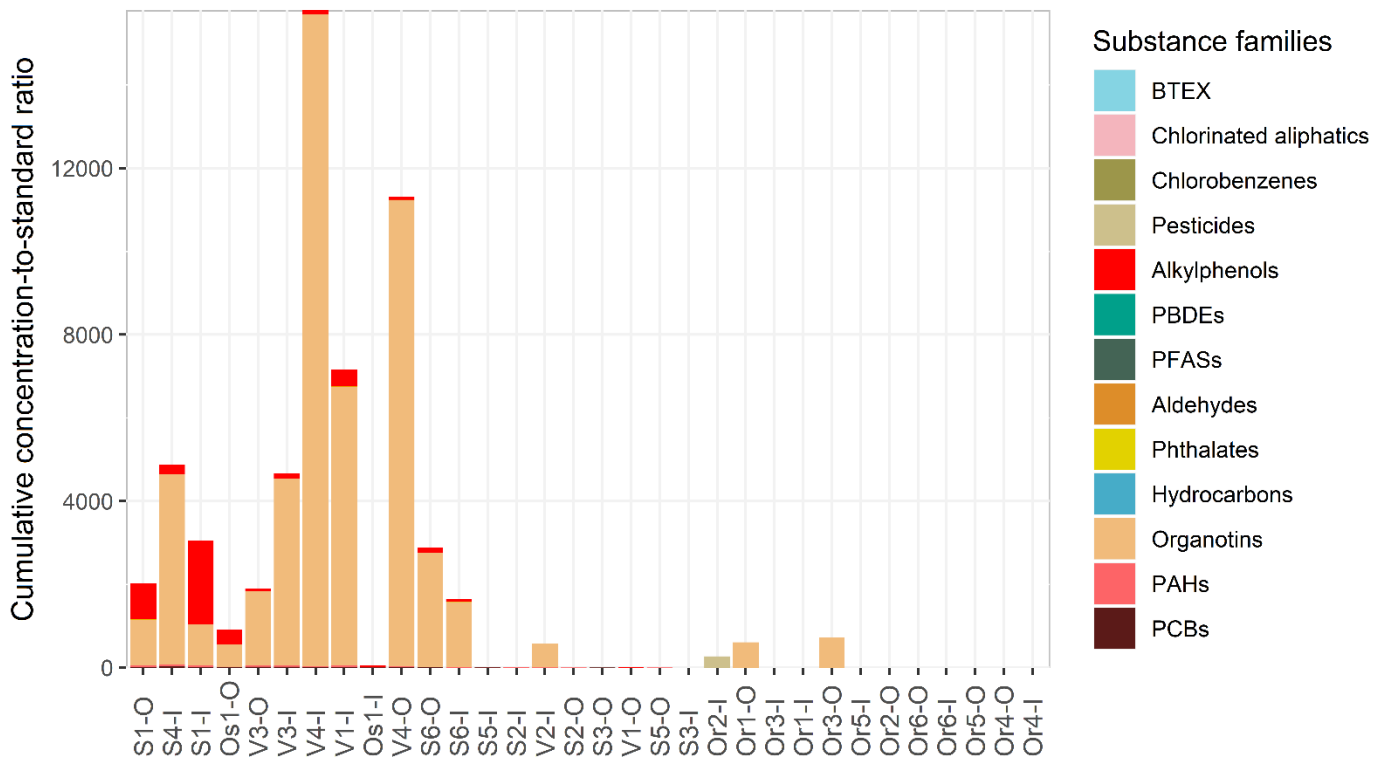

**Figure S3b.** Sum of ratios of quantified substance concentrations to Norwegian environmental quality standards for sediment<sup>47</sup> sorted by substance family.

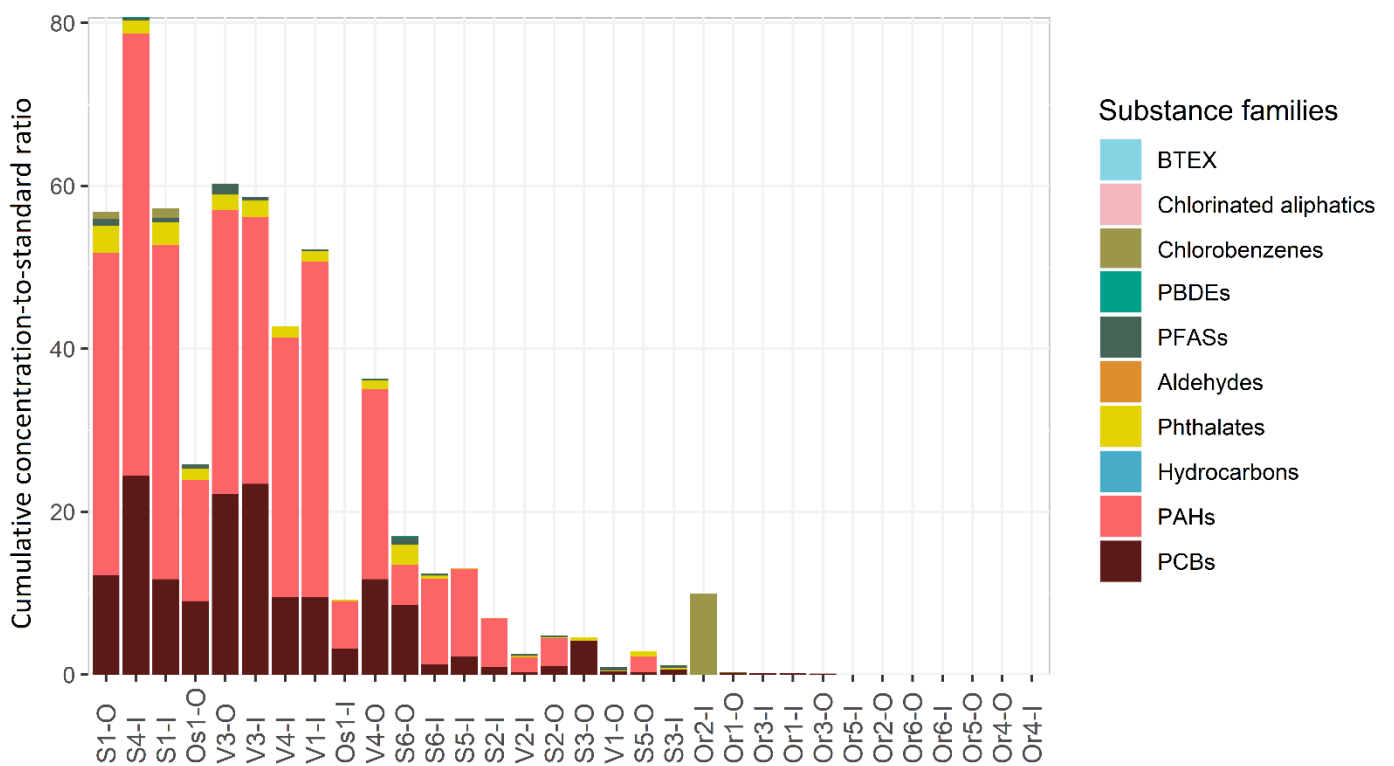

**Figure S3c.** Sum of ratios of quantified substance concentrations to Norwegian environmental quality standards for sediment<sup>47</sup> sorted by substance family, excluding organotins, alkylphenols and pesticides
